# Supplementary material for: Isolation and Culture of Single Microbial Cells by Laser Ejection Sorting Technology
Source: PubMed Central journal article supplement (PMC8824209; doi:10.1128/aem.01165-21), 2022-02-08
Supplement: aem.01165-21-s0001.pdf [file aem.01165-21-s0001.pdf]

## Supplementary information

### **Isolating and culturing of single cells by laser ejection sorting technology**

Peng Liang<sup>a,b</sup>, Bo Liu<sup>a,b</sup>, Yun Wang<sup>c</sup>, Kunxiang Liu<sup>a,b</sup>, Yiping Zhao<sup>d</sup>, Wei E.  
Huang<sup>c,e,\*</sup>, Bei Li<sup>a,f,\*</sup>

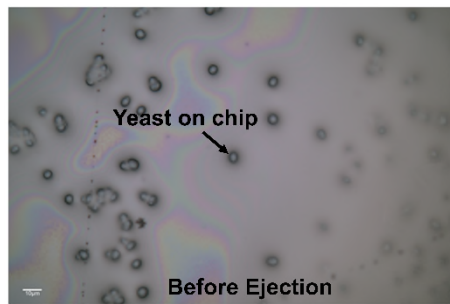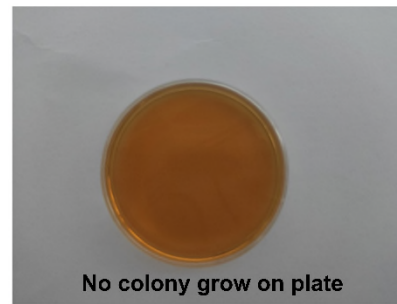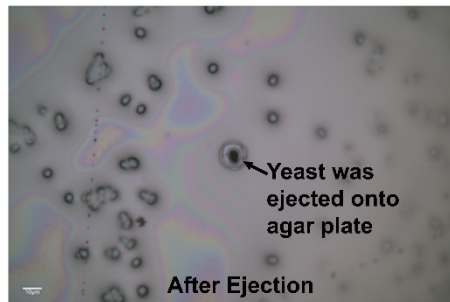

**Supplementary Figure S1.** Simple ejection of the cell cannot get cultivable colony.

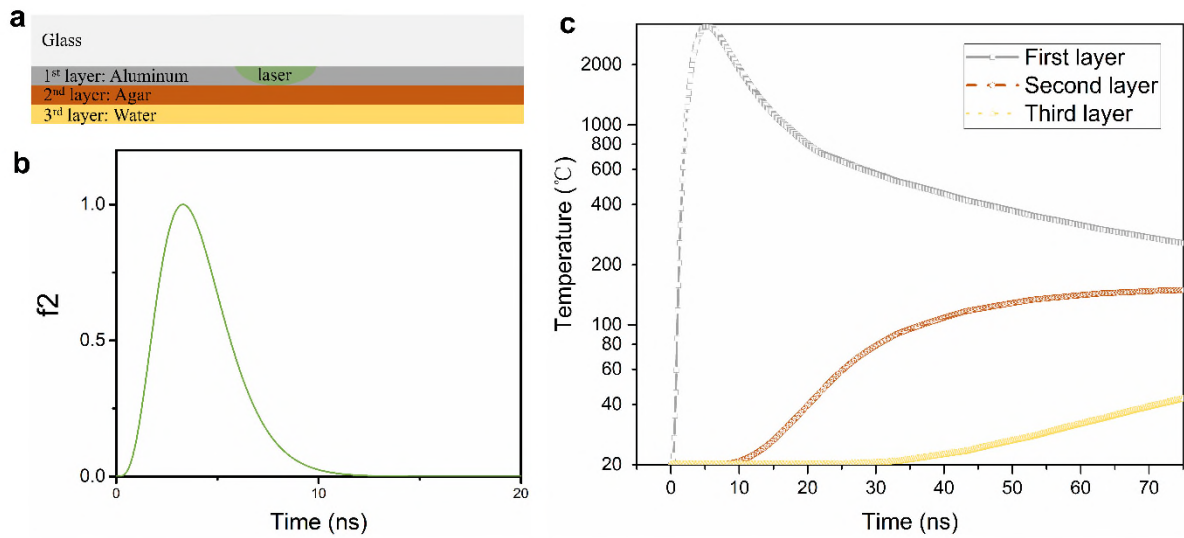

**Supplementary Figure S2.** Numerical simulation of the temperature on the surface of each layer with Comsol®. (a): Schematic of the FE model. (b): Laser pulse's energy variation along time. The single laser pulse ends at about 10 ns. (c): Temperature variation of each layer along time.

*Lactobacillus rhamnosus* GG (L)

*E. coli* (E)

*Saccharomyces cerevisiae* (Y)

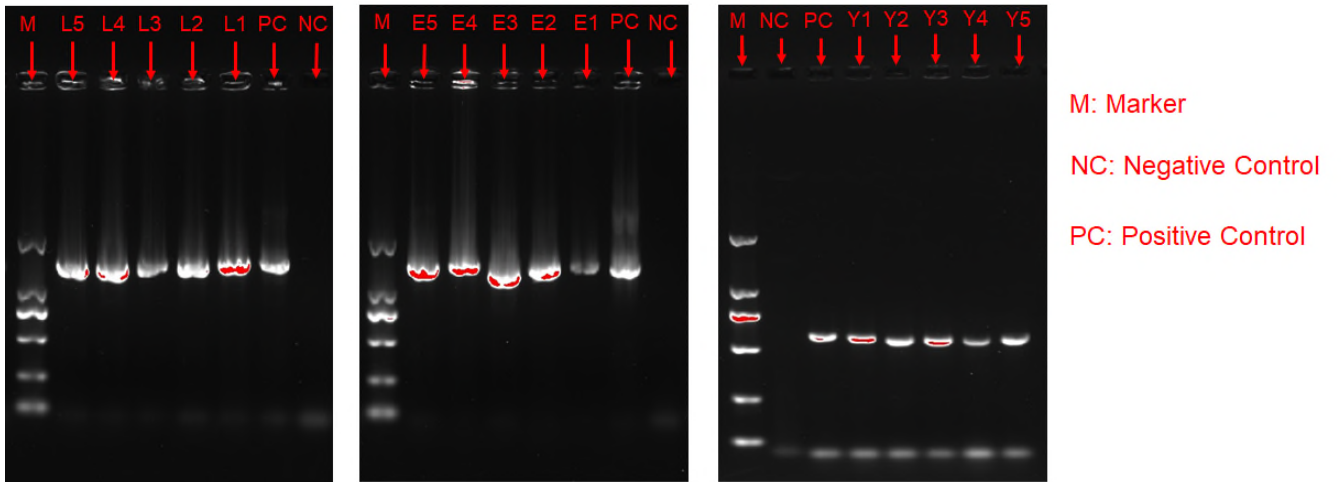

**Supplementary Figure S3.** PCR results from culturable colonies after single cell ejection. The picture was taken by ChemiDoc™ MP Imaging System (Bio-Rad)

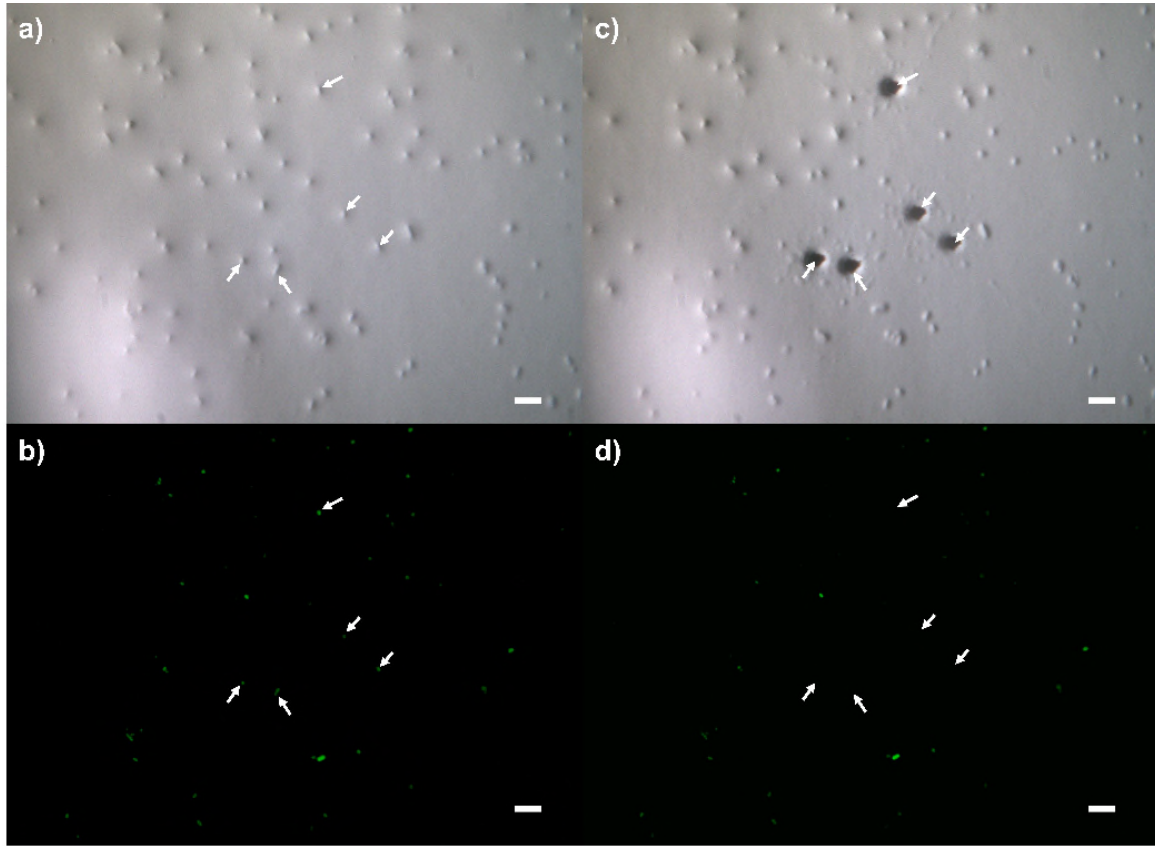

**Supplementary Figure S4.** Fluorescence isolating single *E. coli* JM109 cells with GFP plasmid from *E. coli* DH5 $\alpha$  by LIFT. a) Image before ejecting. b) Fluorescence image before ejecting. c) Image after ejecting. d) Fluorescence image after ejecting. The bar represents 10 $\mu$ m.

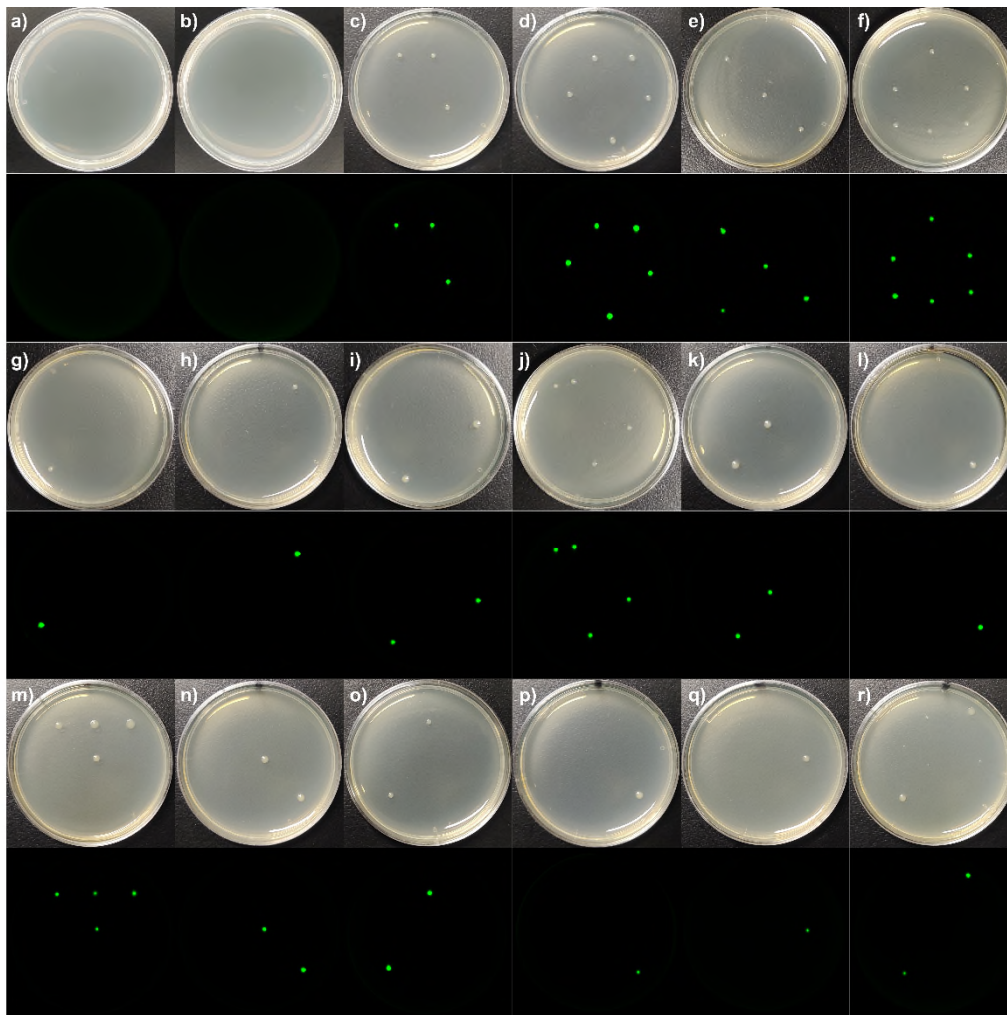

**Supplementary Figure S5.** Culturing results of isolated single Jm109 cells from DH5 $\alpha$ , cultured after 24h, the black picture below each panel is the corresponding fluorescence picture, taken by ChemiDoc MP Imaging System (BIO-RAD) operating on DyLight 488 mode (at 488 and at 532/28).

Panel a: control group which was placed in the air. Panel b: control group which ejecting the blank place around the cell and receiving. Panels c-i show the first experiment, we ejected 9 single cells in each petri dish and 81 single cells on 9 petri dishes totally, about 22 colonies grow on 7 petri dishes. Panels j-r show the second experiment, we ejected 9 single cells in each petri dish and 81 single cells on 9 petri dishes totally, about 19 colonies grow on 9 petri dishes. The single cell's recultivation ratio is about 25.3% (41/162).

| Score        | Expect      | Identity    | Gap         | Strand      | Score       | Expect      | Identity    | Gap         | Strand      | Score       | Expect      | Identity    | Gap         | Strand      |
|--------------|-------------|-------------|-------------|-------------|-------------|-------------|-------------|-------------|-------------|-------------|-------------|-------------|-------------|-------------|
| 1365         | 0.0         | 72.67(199%) |             | PlusMinus   | 1306        | 0.0         | 71.67(199%) |             | PlusMinus   | 1306        | 0.0         | 71.67(199%) |             | PlusMinus   |
| Query 1      | CTCAAGGATTA | CTCAAGGATTA | CTCAAGGATTA | CTCAAGGATTA | Query 4     | CTCCAGGATTA | CTCCAGGATTA | CTCCAGGATTA | CTCCAGGATTA | Query 12    | CTCAAGGATTA | CTCAAGGATTA | CTCAAGGATTA | CTCAAGGATTA |
| Subject 164  | CTCAAGGATTA | CTCAAGGATTA | CTCAAGGATTA | CTCAAGGATTA | Subject 740 | CTCCAGGATTA | CTCCAGGATTA | CTCCAGGATTA | CTCCAGGATTA | Subject 758 | CTCAAGGATTA | CTCAAGGATTA | CTCAAGGATTA | CTCAAGGATTA |
| Query 50     | TTTCAGGATTA | TTTCAGGATTA | TTTCAGGATTA | TTTCAGGATTA | Query 64    | TTTCAGGATTA | TTTCAGGATTA | TTTCAGGATTA | TTTCAGGATTA | Query 71    | TTTCAGGATTA | TTTCAGGATTA | TTTCAGGATTA | TTTCAGGATTA |
| Subject 280  | TTTCAGGATTA | TTTCAGGATTA | TTTCAGGATTA | TTTCAGGATTA | Subject 690 | TTTCAGGATTA | TTTCAGGATTA | TTTCAGGATTA | TTTCAGGATTA | Subject 678 | TTTCAGGATTA | TTTCAGGATTA | TTTCAGGATTA | TTTCAGGATTA |
| Query 120    | TTTCAGGATTA | TTTCAGGATTA | TTTCAGGATTA | TTTCAGGATTA | Query 134   | TTTCAGGATTA | TTTCAGGATTA | TTTCAGGATTA | TTTCAGGATTA | Query 131   | TTTCAGGATTA | TTTCAGGATTA | TTTCAGGATTA | TTTCAGGATTA |
| Subject 462  | TTTCAGGATTA | TTTCAGGATTA | TTTCAGGATTA | TTTCAGGATTA | Subject 620 | TTTCAGGATTA | TTTCAGGATTA | TTTCAGGATTA | TTTCAGGATTA | Subject 618 | TTTCAGGATTA | TTTCAGGATTA | TTTCAGGATTA | TTTCAGGATTA |
| Query 180    | TTTCAGGATTA | TTTCAGGATTA | TTTCAGGATTA | TTTCAGGATTA | Query 154   | TTTCAGGATTA | TTTCAGGATTA | TTTCAGGATTA | TTTCAGGATTA | Query 191   | TTTCAGGATTA | TTTCAGGATTA | TTTCAGGATTA | TTTCAGGATTA |
| Subject 374  | TTTCAGGATTA | TTTCAGGATTA | TTTCAGGATTA | TTTCAGGATTA | Subject 592 | TTTCAGGATTA | TTTCAGGATTA | TTTCAGGATTA | TTTCAGGATTA | Subject 608 | TTTCAGGATTA | TTTCAGGATTA | TTTCAGGATTA | TTTCAGGATTA |
| Query 240    | TTTCAGGATTA | TTTCAGGATTA | TTTCAGGATTA | TTTCAGGATTA | Query 246   | TTTCAGGATTA | TTTCAGGATTA | TTTCAGGATTA | TTTCAGGATTA | Query 251   | TTTCAGGATTA | TTTCAGGATTA | TTTCAGGATTA | TTTCAGGATTA |
| Subject 458  | TTTCAGGATTA | TTTCAGGATTA | TTTCAGGATTA | TTTCAGGATTA | Subject 592 | TTTCAGGATTA | TTTCAGGATTA | TTTCAGGATTA | TTTCAGGATTA | Query 498   | TTTCAGGATTA | TTTCAGGATTA | TTTCAGGATTA | TTTCAGGATTA |
| Query 300    | TTTCAGGATTA | TTTCAGGATTA | TTTCAGGATTA | TTTCAGGATTA | Query 304   | TTTCAGGATTA | TTTCAGGATTA | TTTCAGGATTA | TTTCAGGATTA | Query 511   | TTTCAGGATTA | TTTCAGGATTA | TTTCAGGATTA | TTTCAGGATTA |
| Subject 536  | TTTCAGGATTA | TTTCAGGATTA | TTTCAGGATTA | TTTCAGGATTA | Subject 612 | TTTCAGGATTA | TTTCAGGATTA | TTTCAGGATTA | TTTCAGGATTA | Subject 430 | TTTCAGGATTA | TTTCAGGATTA | TTTCAGGATTA | TTTCAGGATTA |
| Query 360    | TTTCAGGATTA | TTTCAGGATTA | TTTCAGGATTA | TTTCAGGATTA | Query 366   | TTTCAGGATTA | TTTCAGGATTA | TTTCAGGATTA | TTTCAGGATTA | Query 371   | TTTCAGGATTA | TTTCAGGATTA | TTTCAGGATTA | TTTCAGGATTA |
| Subject 624  | TTTCAGGATTA | TTTCAGGATTA | TTTCAGGATTA | TTTCAGGATTA | Subject 632 | TTTCAGGATTA | TTTCAGGATTA | TTTCAGGATTA | TTTCAGGATTA | Query 451   | TTTCAGGATTA | TTTCAGGATTA | TTTCAGGATTA | TTTCAGGATTA |
| Query 420    | TTTCAGGATTA | TTTCAGGATTA | TTTCAGGATTA | TTTCAGGATTA | Query 426   | TTTCAGGATTA | TTTCAGGATTA | TTTCAGGATTA | TTTCAGGATTA | Subject 518 | TTTCAGGATTA | TTTCAGGATTA | TTTCAGGATTA | TTTCAGGATTA |
| Subject 710  | TTTCAGGATTA | TTTCAGGATTA | TTTCAGGATTA | TTTCAGGATTA | Subject 638 | TTTCAGGATTA | TTTCAGGATTA | TTTCAGGATTA | TTTCAGGATTA | Query 491   | TTTCAGGATTA | TTTCAGGATTA | TTTCAGGATTA | TTTCAGGATTA |
| Query 480    | TTTCAGGATTA | TTTCAGGATTA | TTTCAGGATTA | TTTCAGGATTA | Query 486   | TTTCAGGATTA | TTTCAGGATTA | TTTCAGGATTA | TTTCAGGATTA | Subject 518 | TTTCAGGATTA | TTTCAGGATTA | TTTCAGGATTA | TTTCAGGATTA |
| Subject 800  | TTTCAGGATTA | TTTCAGGATTA | TTTCAGGATTA | TTTCAGGATTA | Subject 644 | TTTCAGGATTA | TTTCAGGATTA | TTTCAGGATTA | TTTCAGGATTA | Query 519   | TTTCAGGATTA | TTTCAGGATTA | TTTCAGGATTA | TTTCAGGATTA |
| Query 540    | TTTCAGGATTA | TTTCAGGATTA | TTTCAGGATTA | TTTCAGGATTA | Subject 650 | TTTCAGGATTA | TTTCAGGATTA | TTTCAGGATTA | TTTCAGGATTA | Query 520   | TTTCAGGATTA | TTTCAGGATTA | TTTCAGGATTA | TTTCAGGATTA |
| Subject 886  | TTTCAGGATTA | TTTCAGGATTA | TTTCAGGATTA | TTTCAGGATTA | Subject 656 | TTTCAGGATTA | TTTCAGGATTA | TTTCAGGATTA | TTTCAGGATTA | Subject 528 | TTTCAGGATTA | TTTCAGGATTA | TTTCAGGATTA | TTTCAGGATTA |
| Query 600    | TTTCAGGATTA | TTTCAGGATTA | TTTCAGGATTA | TTTCAGGATTA | Query 606   | TTTCAGGATTA | TTTCAGGATTA | TTTCAGGATTA | TTTCAGGATTA | Query 551   | TTTCAGGATTA | TTTCAGGATTA | TTTCAGGATTA | TTTCAGGATTA |
| Subject 974  | TTTCAGGATTA | TTTCAGGATTA | TTTCAGGATTA | TTTCAGGATTA | Subject 612 | TTTCAGGATTA | TTTCAGGATTA | TTTCAGGATTA | TTTCAGGATTA | Subject 499 | TTTCAGGATTA | TTTCAGGATTA | TTTCAGGATTA | TTTCAGGATTA |
| Query 660    | TTTCAGGATTA | TTTCAGGATTA | TTTCAGGATTA | TTTCAGGATTA | Query 666   | TTTCAGGATTA | TTTCAGGATTA | TTTCAGGATTA | TTTCAGGATTA | Query 551   | TTTCAGGATTA | TTTCAGGATTA | TTTCAGGATTA | TTTCAGGATTA |
| Subject 1062 | TTTCAGGATTA | TTTCAGGATTA | TTTCAGGATTA | TTTCAGGATTA | Subject 622 | TTTCAGGATTA | TTTCAGGATTA | TTTCAGGATTA | TTTCAGGATTA | Subject 499 | TTTCAGGATTA | TTTCAGGATTA | TTTCAGGATTA | TTTCAGGATTA |
| Query 720    | TTTCAGGATTA | TTTCAGGATTA | TTTCAGGATTA | TTTCAGGATTA | Query 726   | TTTCAGGATTA | TTTCAGGATTA | TTTCAGGATTA | TTTCAGGATTA | Query 571   | TTTCAGGATTA | TTTCAGGATTA | TTTCAGGATTA | TTTCAGGATTA |
| Subject 1150 | TTTCAGGATTA | TTTCAGGATTA | TTTCAGGATTA | TTTCAGGATTA | Subject 628 | TTTCAGGATTA | TTTCAGGATTA | TTTCAGGATTA | TTTCAGGATTA | Query 578   | TTTCAGGATTA | TTTCAGGATTA | TTTCAGGATTA | TTTCAGGATTA |
| Query 780    | TTTCAGGATTA | TTTCAGGATTA | TTTCAGGATTA | TTTCAGGATTA | Query 786   | TTTCAGGATTA | TTTCAGGATTA | TTTCAGGATTA | TTTCAGGATTA | Subject 578 | TTTCAGGATTA | TTTCAGGATTA | TTTCAGGATTA | TTTCAGGATTA |
| Subject 1238 | TTTCAGGATTA | TTTCAGGATTA | TTTCAGGATTA | TTTCAGGATTA | Subject 634 | TTTCAGGATTA | TTTCAGGATTA | TTTCAGGATTA | TTTCAGGATTA | Subject 578 | TTTCAGGATTA | TTTCAGGATTA | TTTCAGGATTA | TTTCAGGATTA |

### Supplementary Figure S6. Plasmid sequencing results of the recultivated *E. coli* JM109 (pGFP).s

SPARKeasy Superpure Mini Plasmid Kit (SparkJade, AD0102-B) was used for plasmid extraction.

- (1) Pick and transfer 5 colonies on the sorting culture plate to a 3ml culture tube, and culture overnight at 37°C and 200rpm shaking;
- (2) Centrifuge the 3ml bacterial solution cultured overnight, centrifuge at 13000g for 1min, and collect the bacterial sediment;
- (3) Add 250µl of solution P1 to resuspend the bacterial pellet, shake and mix well;
- (4) Add 250µl of solution P2, gently turn up and down and mix 3-5 times, and leave it at room temperature for 4 minutes;
- (5) Add 350µl of solution P3, immediately and gently mix up and down for 7-8 times to produce a white flocculent precipitate;
- (6) Centrifuge at 13000g for 10 min, and collect the supernatant;
- (7) Add the supernatant to the adsorption column AC, put the adsorption column into the collection tube, centrifuge at 13000g for 1 min, and discard the waste liquid.
- (8) Add 500µl of deproteinized liquid PE, centrifuge at 13000g for 1min, discard the waste liquid;
- (9) Add 600µl rinsing solution WB, centrifuge at 13000g for 1min, discard the waste liquid;
- (10) Repeat the previous step;
- (11) Put the AC column into the empty collection tube, centrifuge at 13000g for 2 minutes to remove the WB residual liquid;
- (12) Remove the AC column and put it in a new centrifuge tube, add 30-70µl of eluent EB in the middle of the adsorption membrane, leave it at room temperature for 2 minutes, and centrifuge at 13000g for 1 minute;

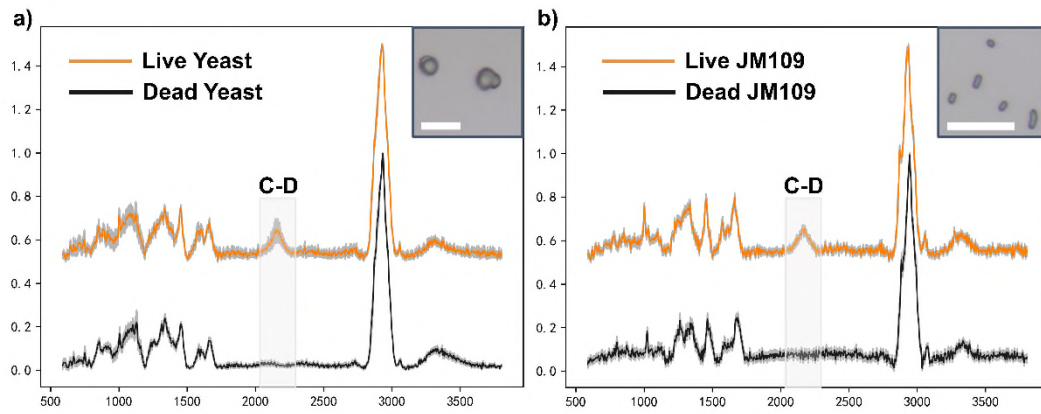

**Supplementary Figure S7.** a) Raman spectroscopy of recultivated yeast. b) Raman spectroscopy of recultivated JM109. The bar represents 10  $\mu\text{m}$ .

The two experiment groups were handled for Raman spectroscopy, as shown in figure, C-D band ( $2040\text{--}2300\text{ cm}^{-1}$ ) exists could prove that the cell's active metabolism.



**a**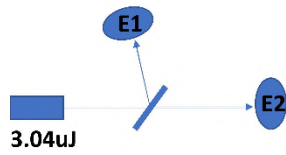

| Thickness of AL | E1     | E2      | Absorption (%) |
|-----------------|--------|---------|----------------|
| 25nm(Domestic)  | 2.33uJ | 124.6nJ | 19.26          |
| 25nm(Imported)  | 2.50uJ | 51.4nJ  | 16.07          |
| 35nm            | 2.53uJ | 23.0nJ  | 16.02          |
| 45nm(Imported)  | 2.65uJ | 7.8nJ   | 12.57          |
| 45nm(Domestic)  | 2.53uJ | 8.0nJ   | 16.51          |
| 60nm(Imported)  | 2.60uJ | 0       | 14.47          |
| 60nm(Domestic)  | 2.60uJ | 0       | 14.47          |
| 80nm            | 2.67uJ | 0       | 12.17          |
| 100nm(Imported) | 2.70uJ | 0       | 11.18          |
| 100nm(Domestic) | 2.58uJ | 0       | 15.13          |
| 150nm           | 2.71uJ | 0       | 10.86          |
| 200nm           | 2.68uJ | 0       | 11.84          |

**b**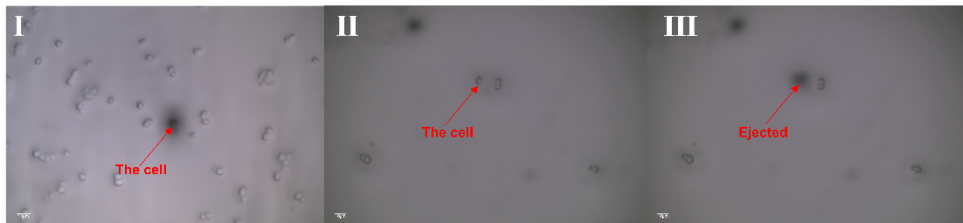

**Supplementary Figure S8 (a):** The absorption of different thickness of aluminum film;

(b): ejection of three-layer LIFT. I: ejection with inadequate energy, the agar film didn't break and the cell were not ejected successfully, II: two cells were close, III: with a suitable ejecting energy, only one cell was ejected with no broken of agar film.

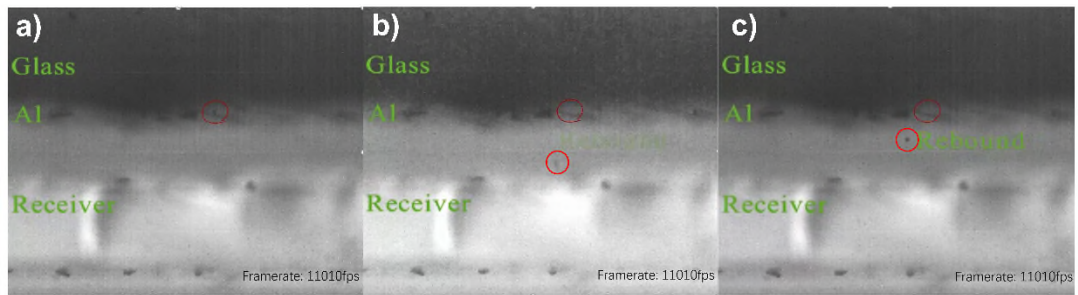

**Supplementary Figure S9.** a) The yeast cell on the LIFT chip; b) The ejected yeast cell hit the receiver (cover glass); c) The yeast cell rebound to highest position and fall slowly again.

Detail could be seen in supplementary video 1

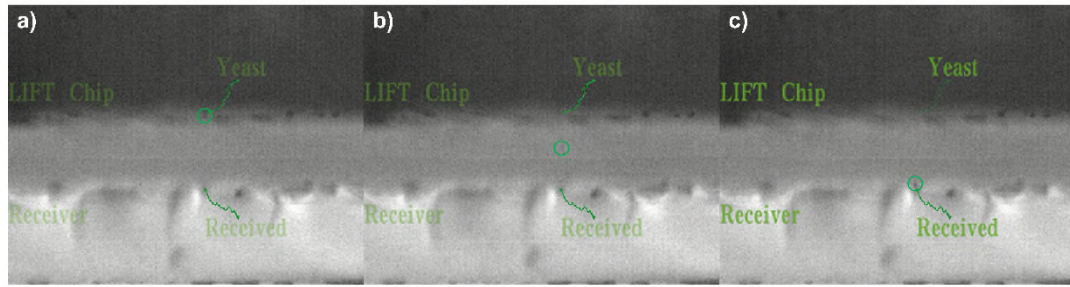

**Supplementary Figure S10.** Flying and landing processes of single yeast cell. a): the yeast cell on the LIFT chip; b): the yeast cell is flying in the air between the LIFT chip and receiver; c): the yeast cell lands on the receiver. The velocity could be calculated about 0.35m/s, and the whole process was shown in supplementary video 2.

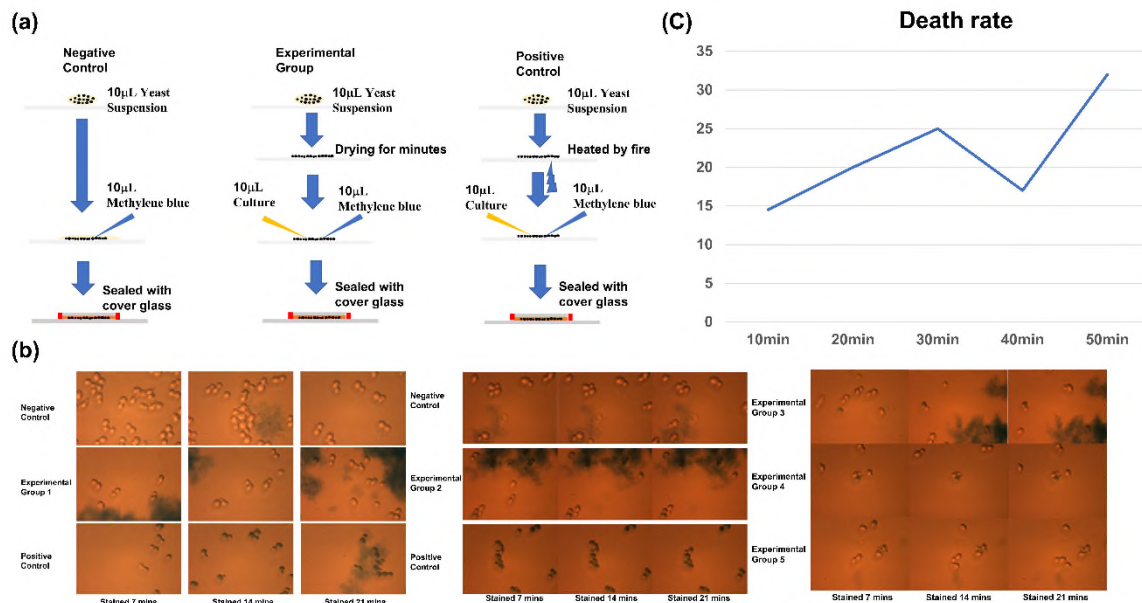

**Supplementary Figure S11.** The death rate of yeast cell drying with time on LIFT chip.

a): diagram of the experiment setup: three groups (Negative group: 10  $\mu$ L yeast suspension stained with 10  $\mu$ L 200mg/L Methylene blue; Experimental group: 10  $\mu$ L yeast suspension drying for 10, 20, 30, 40, 50 minutes respectively, stained with 10  $\mu$ L culture and 10  $\mu$ L 200mg/L Methylene blue; Positive group: 10  $\mu$ L yeast suspension heated with fire for 20 seconds, stained with 10  $\mu$ L culture and 10  $\mu$ L 200mg/L Methylene blue;) of yeast cells were stained on LIFT chip, sealed with cover glass and recorded under microscope.

b): picture of each group of cells after stained 7, 14, 21 minutes.

c): death rate curve of yeast cell with drying time (count according to video recorded)

**Supplementary Table S1. Physical parameters of materials**

| <b>Physical parameters of materials</b>                          | <b>Aluminum</b> | <b>Agar (<math>w = 0.1</math>)</b> | <b>Water</b> |
|------------------------------------------------------------------|-----------------|------------------------------------|--------------|
| <b><math>\rho</math>: density (<math>kg/m^3</math>)</b>          | 2700            | 1065                               | 1000         |
| <b><math>k</math>: thermal conductivity (<math>W/m.K</math>)</b> | 238             | 0.566                              | 0.599        |
| <b><math>C_p</math>: heat capacity (<math>J/kg.K</math>)</b>     | 900             | 4200                               | 4200         |

**Supplementary Table S2. Statistics of *S. cerevisiae*, *E. coli* and LGG's culturing results**

| Number of ejected cells in each microwell | Replicate 1 | Replicate 2 | Replicate 3 | Replicate 4 | Replicate 5 | Recovery rate |     |
|-------------------------------------------|-------------|-------------|-------------|-------------|-------------|---------------|-----|
| <i>S. cerevisiae</i>                      | 1           | 3           | 5           | 5           | 7           | 6             |     |
|                                           | 1           | 5           | 6           | 6           | 7           | 7             | 63% |
| <i>E. coli</i>                            | 1           | 4           | 1           | 1           | 2           | 1             |     |
|                                           | 1           | 5           | 1           | 2           | 2           | 1             | 22% |
| <i>L. rhamnosus</i> GG (LGG)              | 1           | 6           | 5           | 2           | 5           | 5             |     |
|                                           | 1           | 9           | 9           | 8           | 9           | 9             | 74% |
